# Supplementary material for: Tissue-Specific Hormone Signalling and Defence Gene Induction in an In Vitro Assembly of the Rapeseed Verticillium Pathosystem
Source: MDPI journal article supplement (doi:10.3390/ijms241310489), 2023-06-22
Supplement: s1 [file s1]

**Supplementary Table S1:** List of primers used in this study.

| Code              | Sequence (5'-3')         | Amplicon length (bp) | Annealing Temp. | R <sup>2</sup> | Slope  | Efficiency | References        |
|-------------------|--------------------------|----------------------|-----------------|----------------|--------|------------|-------------------|
| OLG70             | CAGCGAAACGCGATATGTAG     | 261                  | 59°C            | 0.998          | -3.232 | 103.9      | Eynck et al. 2007 |
| OLG71             | GGCTTGTAGGGGGTTTAGA      |                      |                 |                |        |            |                   |
| BnaUbiquitin 11-F | AGGCCAAGATCCAAGACAAG     | 154                  | 60°C            | 1.0            | -3.402 | 96.8       | This study        |
| BnaUbiquitin 11-R | TAGAAACCTCCACGGAGACG     |                      |                 |                |        |            |                   |
| BnaActin-F        | ACGACAGCAGAGCGGGAAAT     | 188                  | 60°C            | 0.999          | -3.403 | 96.7       | [65]              |
| BnaActin-R        | GGCTGGAACAGGACCTCTGG     |                      |                 |                |        |            |                   |
| BnaTubulin-F      | CAGCAATACAGTGCCTTGAGTG   | 204                  | 60°C            | 0.999          | -3.367 | 98.2       | [66]              |
| BnaTubulin-R      | CCTGTGTACCAATGAAGGAAAGCC |                      |                 |                |        |            |                   |
| LOX2_F            | GTGGGTGCCATCAGAGTTTT     | 218                  | 60°C            | 0.999          | -3.476 | 93.95      | [67]              |
| LOX2_R            | GTCTCCAGCTCCTGTTTTCG     |                      |                 |                |        |            |                   |
| OPR3_F            | GGCAGTGATGAGGAAGAAGC     | 195                  | 63°C            | 0.993          | -3.467 | 94.3       | This study        |
| OPR3_R            | CTTCGCACCAACCTTAAACC     |                      |                 |                |        |            |                   |
| ACS2_F            | AGGTGGTCAAAGACTTAGATAG   | 128                  | 60°C            | 0.997          | -3.302 | 100.8      | [68]              |
| ACS2_R            | ACCGAGTCGTTGTAAGAATA     |                      |                 |                |        |            |                   |
| ACO4_F            | CATTCTACAACCCTGGAAGCGAC  | 204                  | 59°C            | 1.0            | -3.387 | 97.3       | [69]              |
| ACO4_R            | ATGGTCCAACATTGTTGCCAC    |                      |                 |                |        |            |                   |
| ICS1_F            | ACAGAGTGAAAGGGCATGATG    | 236                  | 60°C            | 1.0            | -3.31  | 100.5      | This study        |
| ICS1_R            | TCGAGGCCTAGTTGCAGC       |                      |                 |                |        |            |                   |
| PR1_F             | AAAGCTACGCCGACCGACTACGAG | 97                   | 59°C            | 0.999          | -3.265 | 102.4      | [14]              |
| PR1_R             | CCAGAAAAGTCGGCGCTACTCCA  |                      |                 |                |        |            |                   |

**Quantification of *B. napus* defence genes by qRT-PCR**  
**LOX2**

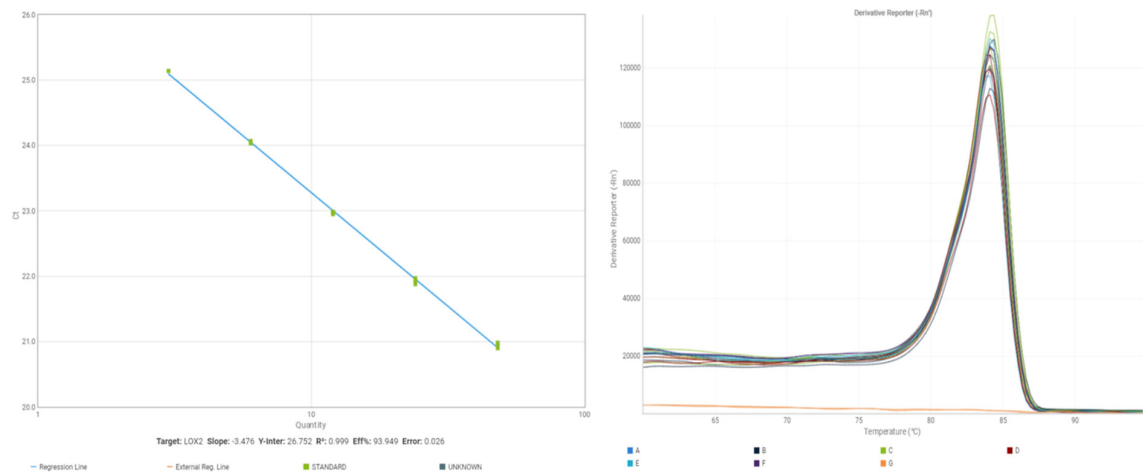

$R^2 = 0.999$ ; Primer efficiency = 93.9%

**OPR3**

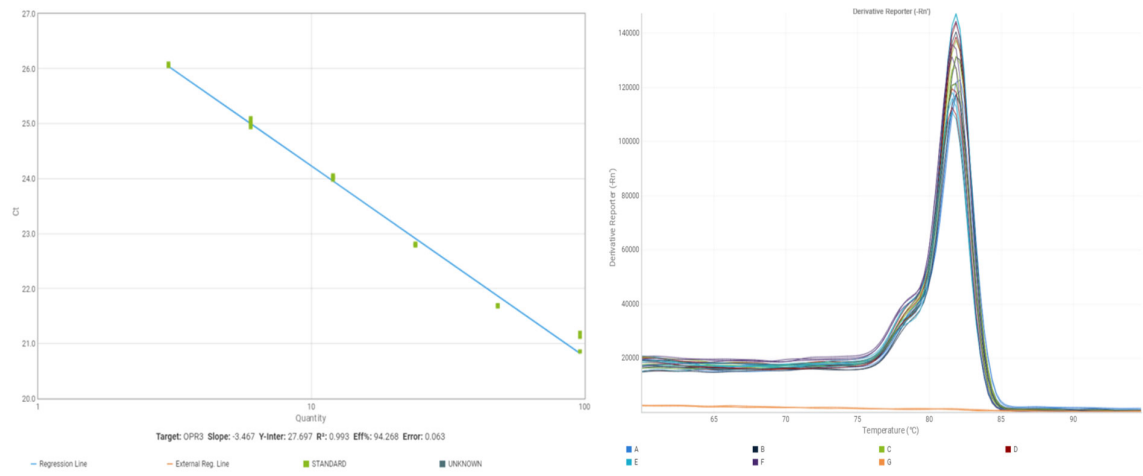

$R^2 = 0.993$ ; Primer efficiency = 94.3%

**ACS2**

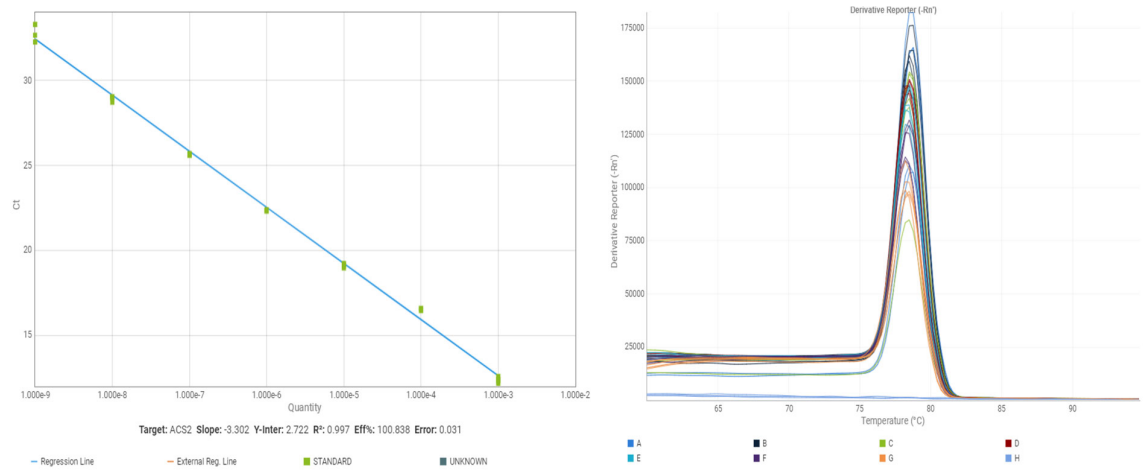

$R^2 = 0.997$ ; Primer efficiency = 100.8%

*ACO4*

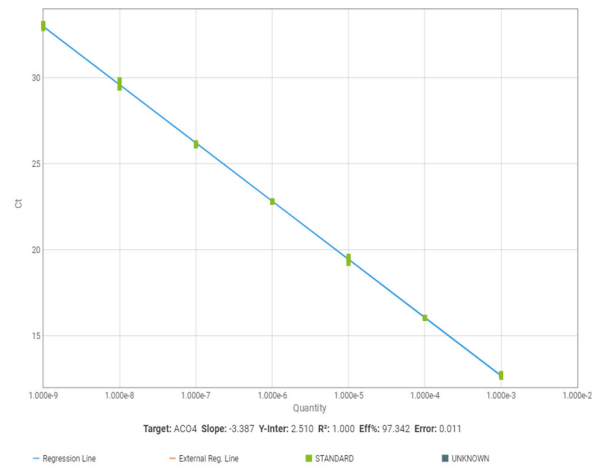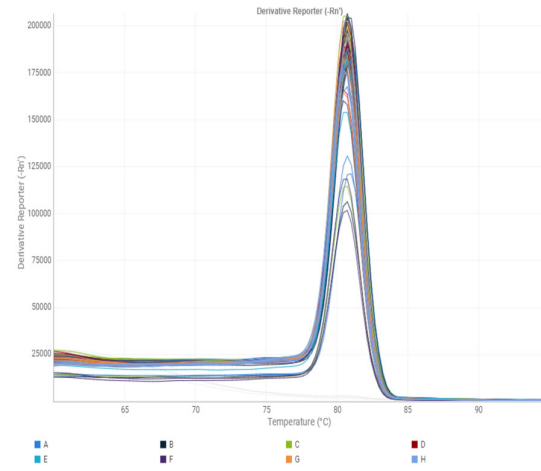

$R^2 = 1.000$ ; Primer efficiency = 97.3%

*ICSI*

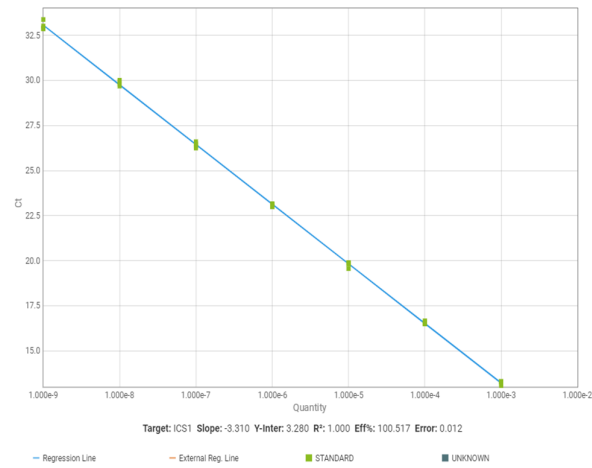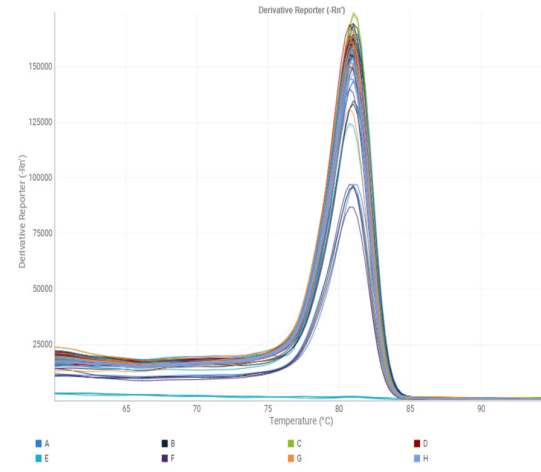

$R^2 = 1.000$ ; Primer efficiency = 100.5%

*PR1*

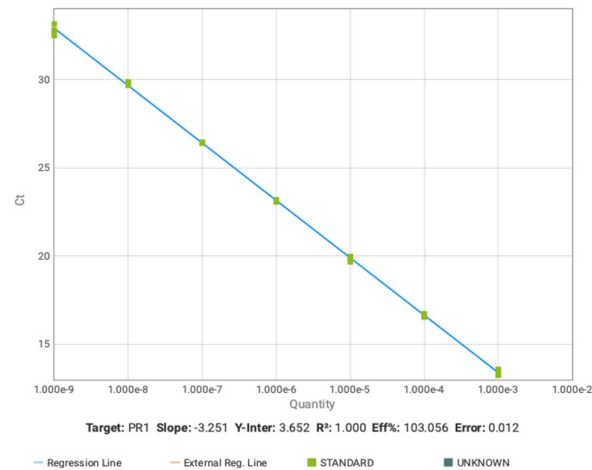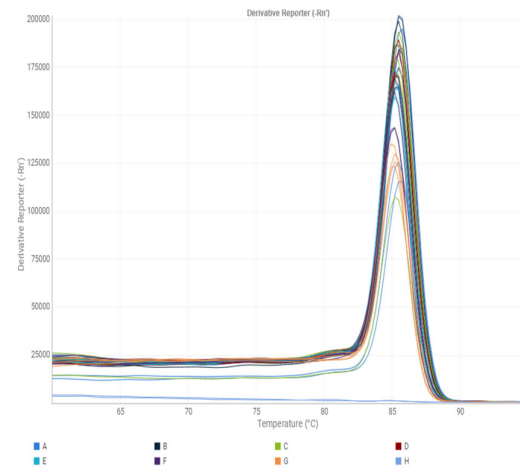

$R^2 = 1.000$ ; Primer efficiency = 103.0%

**Supplementary Figure S1.** Efficiencies of the primer pairs used in this study. Standard curves and melting curves (°C) of resulting PCR products are indicated.

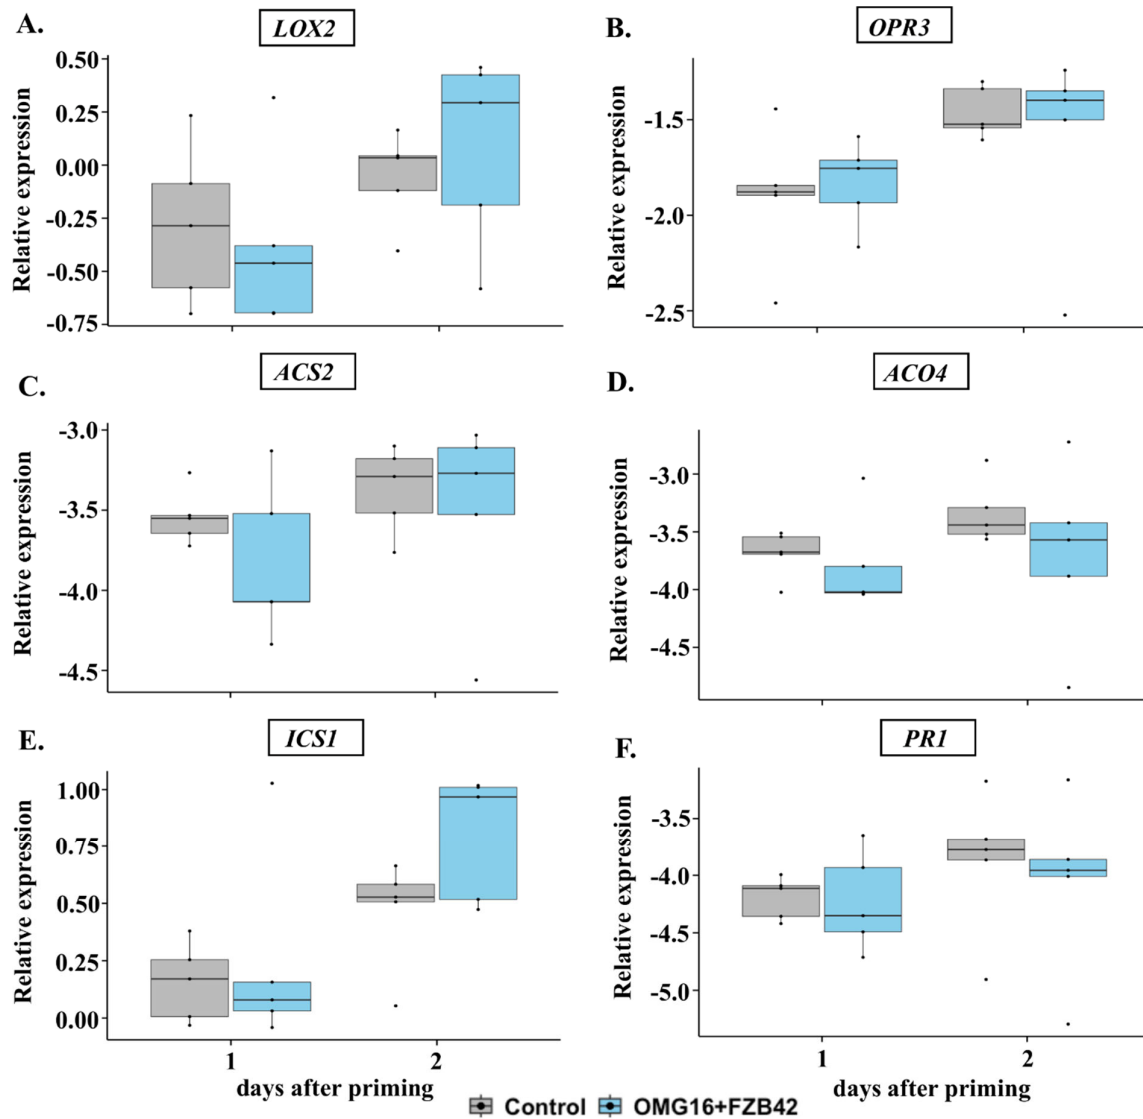

**Supplementary Figure S2.** Relative expression of rapeseed defence genes *LOX2* (A), *OPR3* (B), *ACS2* (C), *ACO4* (D), *ICS1* (E) and *PR1* (F) in roots upon OMG16 plus FZB42 inoculation prior to V143 infection. Roots of two-week-old rapeseed plantlets were primed with OMG16 plus FZB42. The relative transcript abundances of the rapeseed defence genes were analysed by qRT-PCR in roots of the rapeseed plants before V143 infection. *BnaUbiquitin11*, *BnaActin* and *BnaTubulin* were used as endogenous controls for normalization. Box and whisker plots show  $\Delta Cq$  values of five biological replicates with quadruplicate qRT-PCRs where significance of gene expression was calculated by unpaired t-test at  $P < 0.05$ . OMG16, *T. harzianum* OMG16; FZB42, *B. velezensis* FZB42.

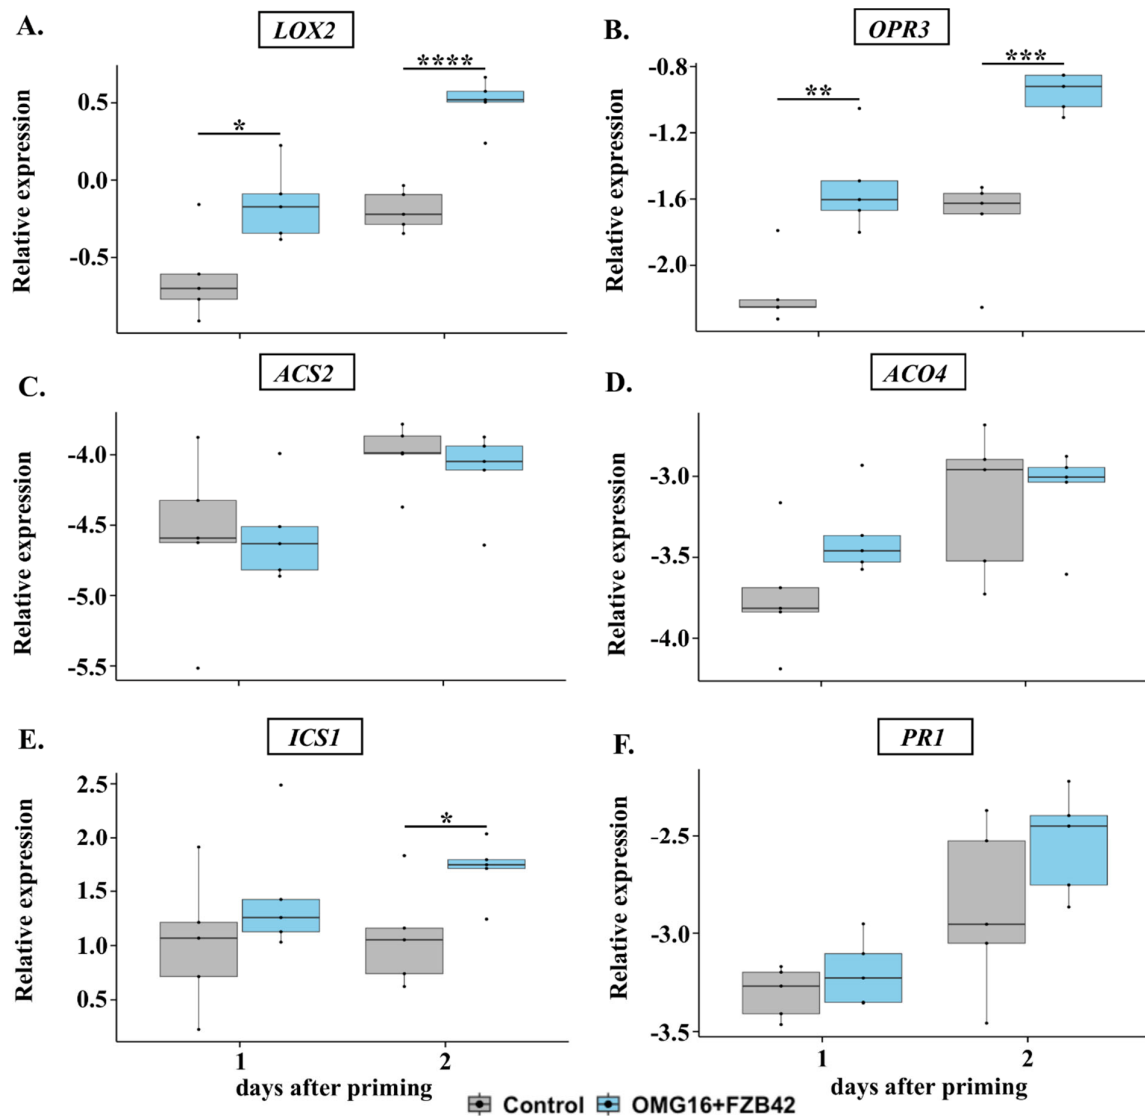

**Supplementary Figure S3.** Relative expression of rapeseed defence genes *LOX2* (A), *OPR3* (B), *ACS2* (C), *ACO4* (D), *ICS1* (E) and *PRI* (F) in stems upon OMG16 plus FZB42 inoculation prior to V143 infection. Roots of two-week-old rapeseed plantlets were primed with OMG16 plus FZB42. To assess systemic responses, the relative transcript abundances of the rapeseed defence genes were analysed by qRT-PCR in stems of the same plants tested in Supplementary Figure S2 before V143 infection. *BnaUbiquitin11*, *BnaActin* and *BnaTubulin* were used as endogenous controls for normalization. Box and whisker plots show  $\Delta Cq$  values of five biological replicates with quadruplicate qRT-PCRs where significance of gene expression was calculated by unpaired t-test at  $P < 0.05$ . \*  $P < 0.05$ ; \*\*  $P < 0.01$ ; \*\*\*  $P < 0.001$ ; \*\*\*\*  $P < 0.0001$ . OMG16, *T. harzianum* OMG16; FZB42, *B. velezensis* FZB42.

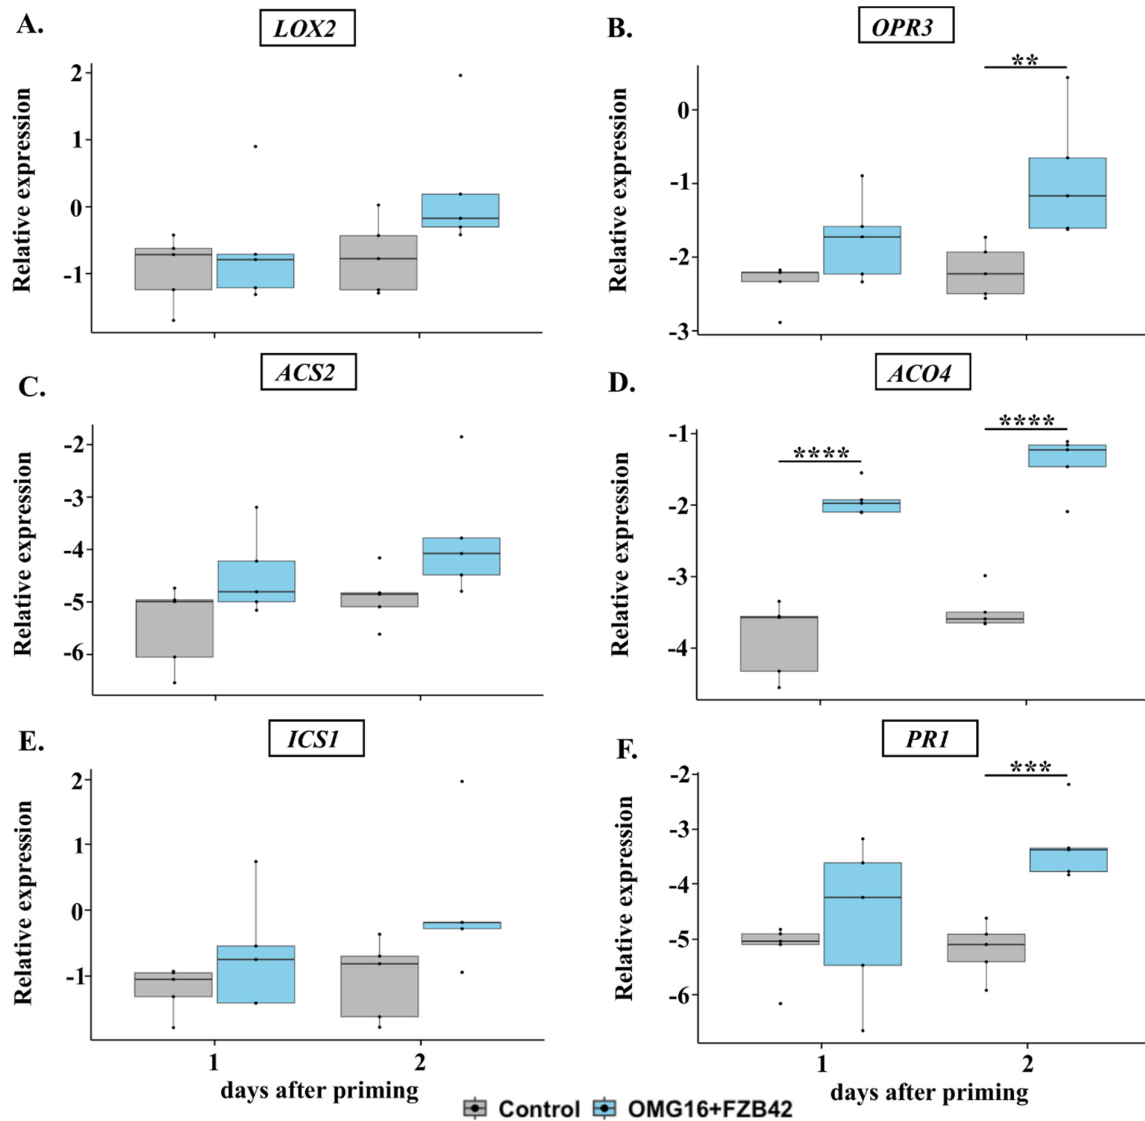

**Supplementary Figure S4.** Relative expression of rapeseed defence genes *LOX2* (A), *OPR3* (B), *ACS2* (C), *ACO4* (D), *ICS1* (E) and *PRI* (F) in leaves upon OMG16 plus FZB42 inoculation prior to V143 infection. Roots of two-week-old rapeseed plantlets were primed with OMG16 plus FZB42. To assess systemic responses, the relative transcript abundances of the rapeseed defence genes were analysed by qRT-PCR in leaves of the same plants tested in Supplementary Figure S2 before V143 infection. *BnaUbiquitin11*, *BnaActin* and *BnaTubulin* were used as endogenous controls for normalization. Box and whisker plots show  $\Delta C_q$  values of five biological replicates with quadruplicate qRT-PCRs where significance of gene expression was calculated by unpaired t-test at  $P < 0.05$ ; \*\*  $P < 0.01$ ; \*\*\*  $P < 0.001$ ; \*\*\*\*  $P < 0.0001$ . OMG16, *T. harzianum* OMG16; FZB42, *B. velezensis* FZB42.
